# Supplementary material
Source: HighWire-hosted journal article supplement (https://www.cmaj.ca/content/suppl/2015/01/19/cmaj.141613)
Supplement: edit-aboriginal-1-at.pdf [file edit-aboriginal-1-at.pdf]

## Appendix 1: References

1. Frketich J. Ontario girl can rely on traditional medicine to treat cancer, court rules. *The Toronto Star* 2014 Nov. 14. Available: [www.thestar.com/news/gta/2014/11/14/ontario\\_girl\\_can\\_rely\\_on\\_traditional\\_medicine\\_to\\_treat\\_cancer\\_court\\_rules.html](http://www.thestar.com/news/gta/2014/11/14/ontario_girl_can_rely_on_traditional_medicine_to_treat_cancer_court_rules.html) (accessed 2014 Dec. 18).
2. Rice W, Rieti J, Walker C. Aboriginal right to refuse chemotherapy for child spurs debate. *CBC News*. 2014 Nov. 14. Available: [www.cbc.ca/news/aboriginal/aboriginal-right-to-refuse-chemotherapy-for-child-spurs-debate-1.2854317](http://www.cbc.ca/news/aboriginal/aboriginal-right-to-refuse-chemotherapy-for-child-spurs-debate-1.2854317) (accessed 2014 Dec. 18).
3. Luke M, Walker C. Florida spa that treated First Nations girls with cancer faces lawsuits from ex-staff. *CBC News*. 2014 Dec. 12. Available: [www.cbc.ca/news/aboriginal/florida-spa-that-treated-first-nations-girls-with-cancer-faces-lawsuits-from-ex-staff-1.2867597](http://www.cbc.ca/news/aboriginal/florida-spa-that-treated-first-nations-girls-with-cancer-faces-lawsuits-from-ex-staff-1.2867597) (accessed 2014 Dec. 18).
4. First Nations Information Governance Centre data online. Health: traditional medicine. Akwesasne (ON): First Nations Information Governance Centre. Available: <http://data.fnigc.ca/online> (accessed 2014 Dec. 18)
5. Minister of Supply and Services Canada. Royal Commission on Aboriginal Peoples. *People to people, nation to nation: highlights from the report of the Royal Commission on Aboriginal Peoples*. Ottawa: Minister of Supply and Services Canada; 1996. Available: [www.aadnc-aandc.gc.ca/eng/1100100014637/1100100014637](http://www.aadnc-aandc.gc.ca/eng/1100100014637/1100100014637) (accessed 2014 Dec. 18)
6. Vogel L. Is your hospital culturally safe? *CMAJ* 2014; Dec. 1. [Epub ahead of print].
7. Empathy, dignity, and respect: creating cultural safety for Aboriginal people in urban health care. Toronto: Health Council of Canada; 2012. Available: [www.healthcouncilcanada.ca/rpt\\_det.php?id=437](http://www.healthcouncilcanada.ca/rpt_det.php?id=437) (accessed 2014 Dec. 18).
8. Vogel L. Broken trust drives native health disparities. *CMAJ* 2014; Dec. 1. [Epub ahead of print].
9. Indigenous Cultural Competency (ICC) Online Training Program. Vancouver: Provincial Health Services Authority in BC. Available: [www.culturalcompetency.ca/](http://www.culturalcompetency.ca/) (accessed 2014 Dec. 18).
